# Supplementary material
Source: PubMed Central journal article supplement (PMC6214852)

**Supplementary information for: “Treatment of donor cells with recombinant KDM4D protein improves preimplantation development of cloned ovine embryos”**

Yumei Zhang · Qianqian Wang · Kailing Liu · Enen Gao · Hong Guan · Jian Hou\*

State Key Laboratory of Agrobiotechnology and College of Biological Science, China Agricultural University, Beijing, China

\*Correspondence: Dr. Jian Hou, State Key Laboratory of Agrobiotechnology and College of Biological Science, China Agricultural University, Yuan-Ming-Yuan West Road, Haidian District, 100193, Beijing, China. E-mail: houjian@cau.edu.cn. Tel: 86-10-62733355

**Supplementary Table1: Primers for real-time PCR**

| Genes  | Sequences (5' to 3')             | Sizes (bp) |
|--------|----------------------------------|------------|
| GAPDH  | Forward: TGATGACATCAAGAAGGTGGTG  | 240        |
|        | Reverse: TCCTTGGAGGCCATGTAGGCCAT |            |
| POU5F1 | Forward: CGCAGGGGGACCCGTATCCTT   | 99         |
|        | Reverse: GGGACCGAAGAGTACAGTGTAG  |            |
| NANOG  | Forward: CCAGCAACGGCAGAATACCC    | 107        |
|        | Reverse: GGGGTTATTCCAGGTCTGGTTA  |            |
| SOX2   | Forward: CCTGTGGTTACCTCTTCTTCCC  | 145        |
|        | Reverse: CGCTCTGGTAGTGCTGGGACA   |            |
| CDX2   | Forward: AGCCAGGTCCGCTGAGAAGC    | 116        |
|        | Reverse: TGGGTGACAGTAGGGTTAACA   |            |
| KLF4   | Forward: CCCTTCCTGCCCGACCAGAT    | 210        |
|        | Reverse: CCGCCTTCCCCTCTTTGGTT    |            |

**Supplementary Figure 1. Expression and purification of recombinant human KDM4D**

**(rhKDM4D).** The recombinant protein was produced in *E. coli* and purified by affinity chromatography. Protein samples were analyzed by SDS-PAGE. **(a)** Protein samples before eluted. lane 1, Marker; lane 2, without isopropyl- $\beta$ -D-thiogalactoside (IPTG) induction; lane 3, with IPTG induction; lane 4, soluble protein fraction; lane 5-7, washing solution with non-specific binding protein from the column. **(b)** Target protein after elution. Lane 1, Marker; lane 2-7, eluent containing rhKDM4D after affinity purification. **(c)** Western blotting identification of purified rhKDM4D protein by anti-6 $\times$ his antibody. The expected molecular weight of rhKDM4D is 43 kDa.

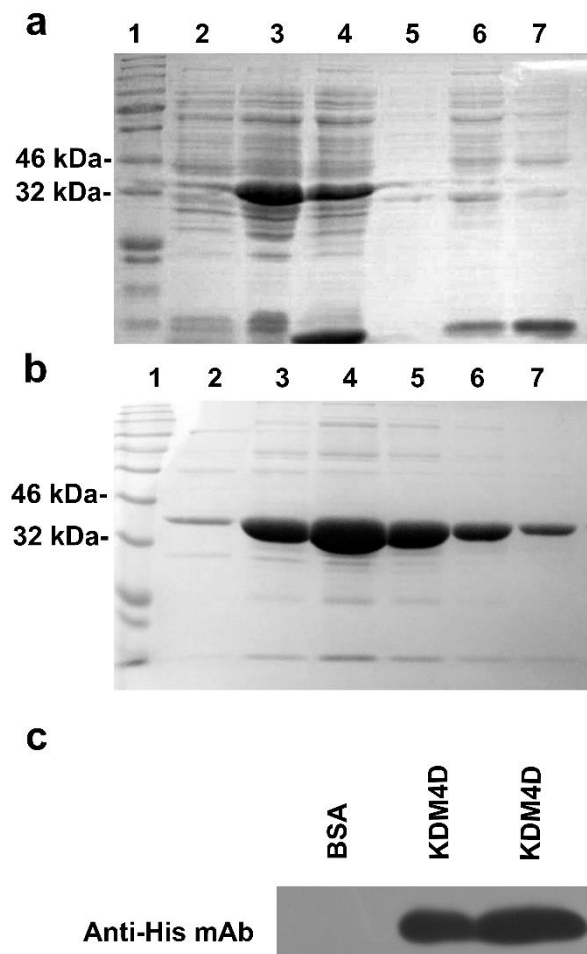

Supplement: 10616_2018_224_MOESM1_ESM.pdf [file 10616_2018_224_MOESM1_ESM.pdf]
